# Supplementary material for: Occupational stress and related factors among surgical residents in Korea
Source: PubMed Central journal article supplement — Ann Surg Treat Res. 2015 Oct 28;89(5):268–74. doi: 10.4174/astr.2015.89.5.268 (PMC4644908; doi:10.4174/astr.2015.89.5.268), 2015-10-28
Supplement: astr-89-268-s001.pdf [file astr-89-268-s001.pdf]

**Supplementary material.** The Korean Occupational Stress Scale questionnaire in English

| Subscales             | Item No. | Contents                              | Questions                                                                       |
|-----------------------|----------|---------------------------------------|---------------------------------------------------------------------------------|
| Occupational climate  | 1        | Collective culture                    | Dining out after work makes me uncomfortable.                                   |
|                       | 2        | Inconsistency of job order            | I am asked to do my work with irrational principle or inconsistency.            |
|                       | 3        | Authoritarian climate                 | My company climate is authoritative and hierarchical.                           |
|                       | 4        | Gender discrimination                 | I take disadvantages since I am woman (man).                                    |
| Physical environment  | 5        | Work environment                      | My workplace is clean and comfortable.                                          |
|                       | 6        | Dangerous work                        | I am exposed to dangerous work and possibility of high risk of accidents.       |
|                       | 7        | Physical burden                       | I have to work for a long time taking uncomfortable posture.                    |
| Job demand            | 8        | Time pressure                         | Due to many things to do, I always feel time pressure.                          |
|                       | 9        | Overlapping jobs                      | I am asked to do another work before finishing the work I am doing.             |
|                       | 10       | Increasing workload                   | My job has become increasingly overloading.                                     |
|                       | 11       | Responsibility                        | I feel myself responsible for coworkers and subordinates.                       |
|                       | 12       | Excessive work                        | My work requires a long lasting concentration.                                  |
|                       | 13       | Insufficient rest                     | Sufficient rest is provided during working hours.                               |
|                       | 14       | Work-home interface                   | I cannot do well at both work and home.                                         |
|                       | 15       | Multiple functioning                  | I have to do various jobs simultaneously.                                       |
| Degree of autonomy    | 16       | Noncreative work                      | My work requires creativity.                                                    |
|                       | 17       | Unpredictability                      | Without notice. Work-related things tend to change.                             |
|                       | 18       | Skill underutilization                | My work requires a high level of skill or knowledge.                            |
|                       | 19       | Little or no decision-making          | I can make my own decision in my job and give influence over the work.          |
|                       | 20       | Low control                           | I can control my work pace and time schedule.                                   |
| Relationship conflict | 21       | Inadequate supervisor support         | My supervisor is helpful in getting the job done.                               |
|                       | 22       | Inadequate coworker support           | My coworker is helpful in getting the job done.                                 |
|                       | 23       | lack of emotional support             | I have someone who understands my difficulties at work.                         |
|                       | 24       | Inadequate coworker support           | I have a co-worker(s) to share my problems at work.                             |
| Job instability       | 25       | Uncertainty of getting a new job      | I can easily get a new job when I quit my job.                                  |
|                       | 26       | Difficulty in getting a new job       | I can easily find a new job equal to the condition of the current job.          |
|                       | 27       | Uncertainty                           | My future is uncertain because the current situation of my company is unstable. |
|                       | 28       | Insecurity                            | I can hardly be fired or unemployed.                                            |
|                       | 29       | Possibility of layoff                 | It is possible to lose my job within two years.                                 |
|                       | 30       | Changes negative to my job            | Undesirable changes (i.e. downsizing) will come to my job.                      |
| Organizational system | 31       | Unfair organizational policy          | The organizational policy of my company is fair and reasonable.                 |
|                       | 32       | Unsatisfactory organizational support | My company provides me with sufficient organizational supports.                 |
|                       | 33       | Inter-department conflict             | Departments cooperate each other without conflicts.                             |
|                       | 34       | Disparity of goal attainment          | All company members cooperate in harmony for the company.                       |
|                       | 35       | Limitation of communication           | I have opportunities and channels to talk about my ideas.                       |
|                       | 36       | Poor carrier development              | I expect my carrier development and promotion to progress as I plan.            |
|                       | 37       | Status inconsistency                  | My current status is appropriate for my education and career.                   |

---

**Lack of reward**

|    |                             |                                                                             |
|----|-----------------------------|-----------------------------------------------------------------------------|
| 38 | Unreachable expectation     | My job is under my expectation.                                             |
| 39 | Unsatisfactory salary       | My salary is not appropriate to my effort and work performance.             |
| 40 | Unfair treatment            | I acquire respect and confidence from my company.                           |
| 41 | Lack of interest            | I am interested in my job.                                                  |
| 42 | Future ambiguity            | I believe that I will be given more rewards from my company if I work hard. |
| 43 | Interruption of opportunity | I am provided with opportunity of developing my capacity.                   |

---
